# Supplementary material for: Dual pulse-chase microscopy reveals early divergence in the biosynthetic trafficking of the Na,K-ATPase and E-cadherin
Source: PubMed Central journal article supplement — Mol Biol Cell. 2015 Dec 1;26(24):4401–11. doi: 10.1091/mbc.E14-09-1385 (PMC4666135; doi:10.1091/mbc.e14-09-1385), 2015-12-01
Supplement: supp_E14-09-1385v1_CombinedSupMats.pdf [file supp_E14-09-1385v1_CombinedSupMats.pdf]

# Supplemental Materials

*Molecular Biology of the Cell*

Farr et al.

**Supplemental Figure-1. Generation and validation of the SNAP-CLIP cell line (A)**

Samples were lysed in Triton X-100 buffer and analyzed by 8% SDS PAGE prior to western blotting with the indicated antibodies. (B) Filter grown cells were fixed and stained with the indicated antibodies as described in the legend for Figure 4. E-cadherin (red), gp135 (blue) and ZO-1 (green).

**Supplemental Figure 2. E-cadherin exits the ER more rapidly than does the Na,K-ATPase.**

SNAP-CLIP cells were blocked and pulsed for the indicated times, and newly synthesized E-cadherin and Na,K-ATPase were recovered with BG-biotin and streptavidin as described in the Methods Section. Recovered proteins were mock treated or subjected to digestion with Endo H or PNGase F, after which they were separated by SDS-PAGE and analyzed by western blotting using antibodies directed against E-cadherin or the Na,K-ATPase  $\beta$ -subunit. At the earliest time point tested for E-cadherin the high molecular weight precursor form was detected, but the protein had already acquired resistance to Endo H digestion. In contrast, the 45 kDa Endo H-sensitive immature form of the Na,K-ATPase  $\beta$ -subunit was still detected 30 minutes after the completion of a 30 minute pulse incubation. After 60 minutes of chase essentially all of the newly synthesized Na,K-ATPase  $\beta$ -subunit was in the 55 kDa Endo H-resistant mature form.

**Supplemental Figure-3. During the 14°C Block, sodium pump and E-cadherin signals predominantly co-localize in the Golgi complex.**

(A-B) SNAP-CLIP cells were blocked and pulsed as described in the legend for Figure 4 prior to incubation of cells at

14°C. Samples were fixed and imaged as described above. CT-TMR is depicted in red, Alexa488-SNAP is shown in green and the indicated antibodies shown in blue. In panel A staining of the HA epitope tag (corresponding to the steady-state pool of Na,K-ATPase at the basolateral plasma membrane) is depicted in purple. (Bar = 5 $\mu$ .)

**Supplemental Figure 4. Following incubation at 19° C in the presence of BFA newly synthesized E-cadherin and Na,K-ATPase localize to different compartments.**

SNAP-CLIP cells were blocked and pulsed as described in the legend for Figure 4. Samples were incubated in the presence of 5  $\mu$ g/ml BFA for 2h at 19°C after which they were fixed, labeled and imaged. E-cadherin labeled with CT-TMR is depicted in red and Na,K-ATPase labeled with Alexa488-SNAP is shown in green. Staining for the Golgi marker Vti1a is depicted in blue. (Bar = 10  $\mu$ )

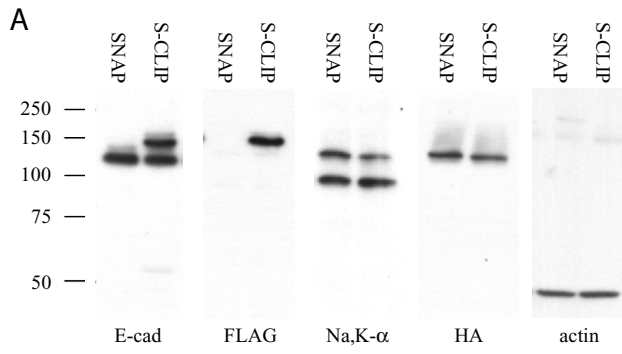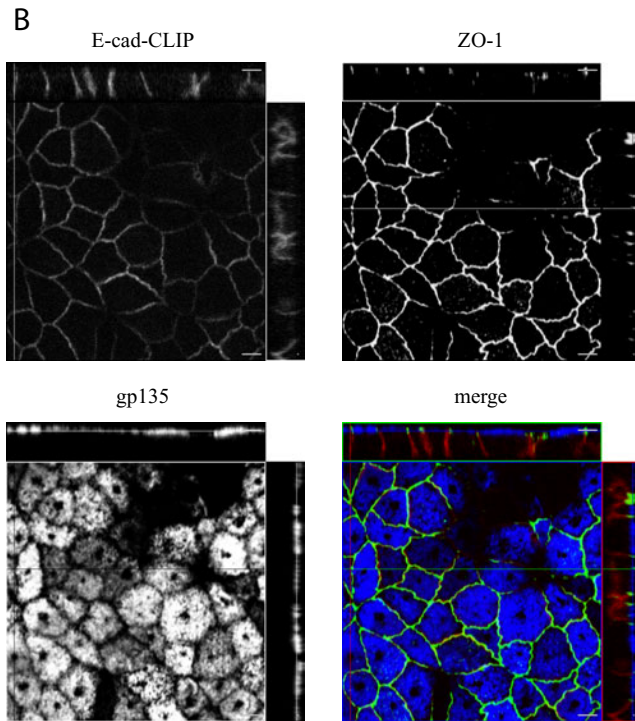

Supplemental Figure 1

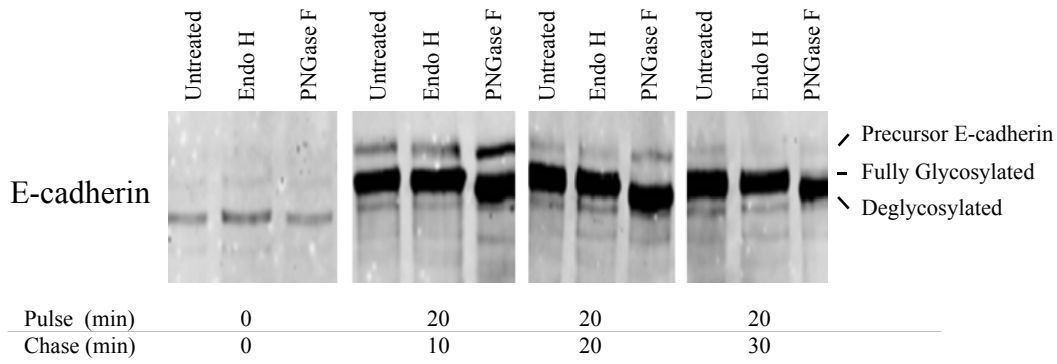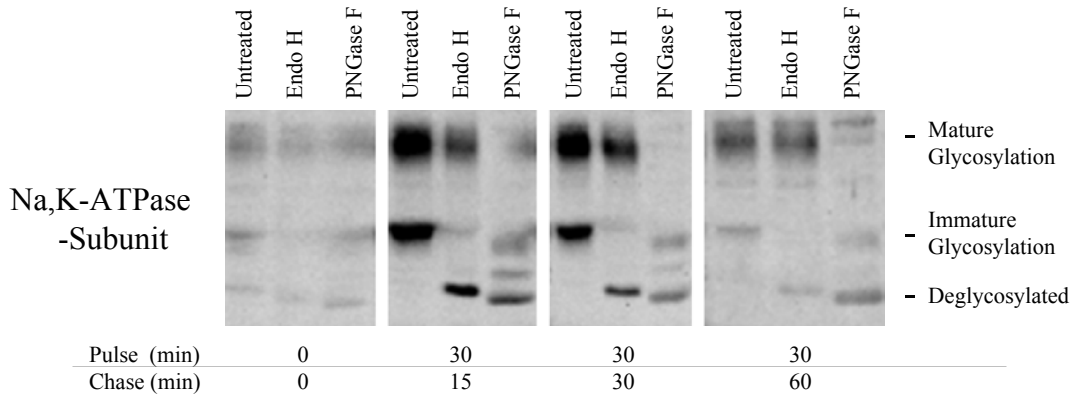

Supplemental Figure 2

A

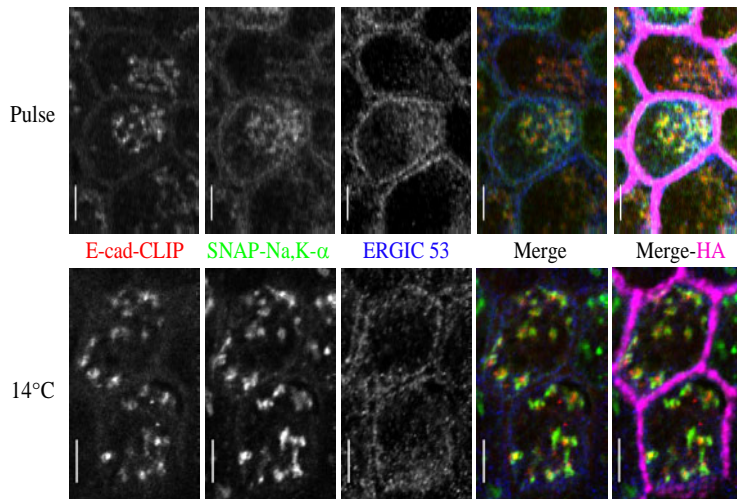

B

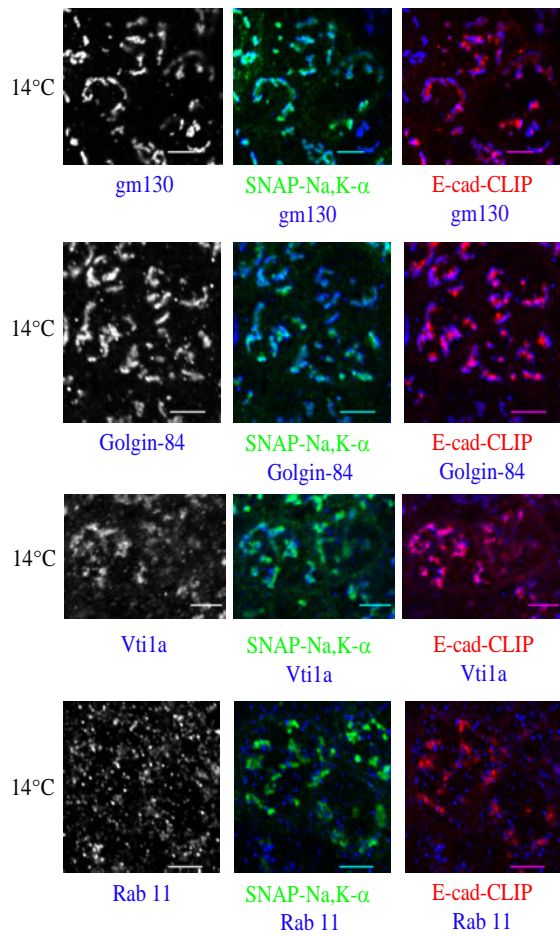

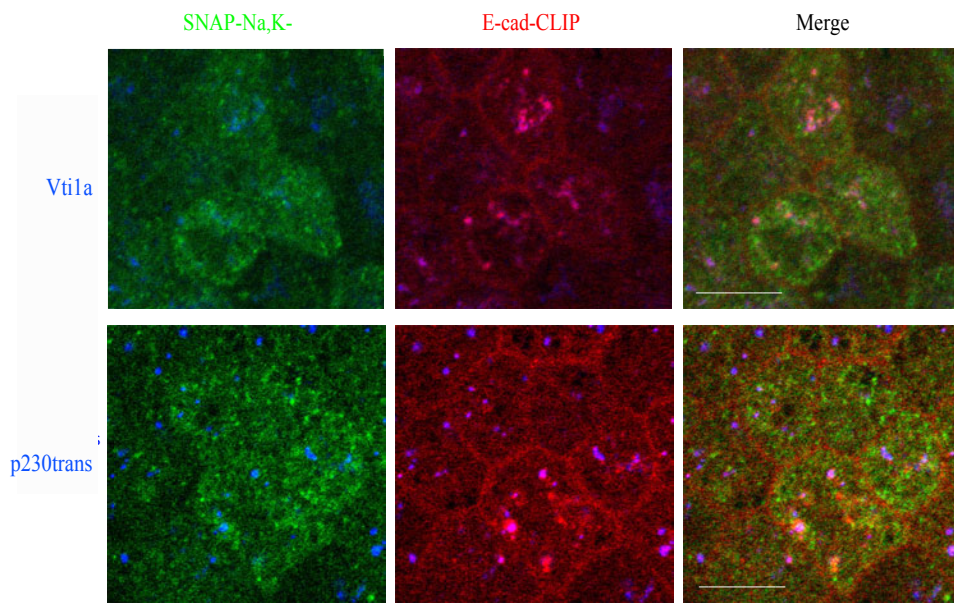

Supplemental Figure - 4
